# Supplementary material for: Dynamics of Medical Screening: A Simulation Model of PSA Screening for Early Detection of Prostate Cancer
Source: MDPI journal article supplement (doi:10.3390/systems11050252), 2023-05-16
Supplement: s1 [file s1]

Archive with 1 entries (1 files):
- systems-2291585-Supplementary.pdf
